# Supplementary material for: A Review of In Situ Methods—Solid Phase Adsorption Toxin Tracking (SPATT) and Polar Organic Chemical Integrative Sampler (POCIS) for the Collection and Concentration of Marine Biotoxins and Pharmaceuticals in Environmental Waters
Source: MDPI journal article supplement (doi:10.3390/molecules27227898), 2022-11-15
Supplement: s1 [file s1]

## Supplementary Materials

### Contents

**Figure S1:** Marine biotoxin structures: (a) Okadaic acid (DSP); (b) yessotoxin (DSP); (c) Azaspiracid (AZP); (d) Saxitoxin (PSP); (e) Domoic acid (NSP); (f) 7 Brevetoxin (PbTX-1) Type-A (NSP); (g) PbTX-2 (Type-B); (h) PbTX-3 (Type-B); (i) Ciguatoxin-1 (CTX); (j) Ciguatoxin-2; (k) 8 Ciguatoxin-3; (l) Ciguatoxin-4A; (m) Ciguatoxin-4B; (n) Pectenotoxin-1 (PTX-1: DSP), (o) Pectenotoxin-2 (PTX-2: DSP), (p) Dinophysistoxin-1 (DTX-1: DSP), (q) Dinophysistoxin-2 (DTX-2: DSP) and (r) Dinophysistoxin-3 (DTX-3: DSP).

**Figure S2:** (a) SPATT bags and discs with various resins contained within 80 mm polyester mesh; (b) SPATT bags being 12 deployed. However, after this initial design other studies applied the same bags in a different manner to support the 13 SPATT bags in the water flow. Diagram [158]; (c) SPATT bags among holding tubes. (A) 100 mm nylon mesh, 14 (B) resin, (C) inner holding ring; (D) outer holding ring, (F) 75 mm diameter embroidery ring and (E) final assembled 15 sampling disk [242]. (d) SPATT bags attached to aluminum alloy [160].

**Figure S3:** (a) Chemical Structure DIAION HP-20 (Aromatic synthetic adsorbent ion-exchange resin) Styrene-18 divinylbenzene [162]; (b) SEPABEADS SP700 (Aromatic synthetic adsorbent ion-exchange resin) [165] (c) SEPABEAD 19 SP207 (Modified Aromatic synthetic adsorbent ion-exchange resin) Brominated styrene divinylbenzene [164]; (d) 20 DIAION HP2MG (Methacrylic synthetic adsorbent ion-exchange resin) Polymethacrylate [164].

**Figure S4:** Schematic diagram of pumping system [159].

**Figure S5:** Organic Chemical Integrative Sampler (POCIS) device [316]: (a) POCIS or Aquasense-P disk; (b) Polar 25 Organic Chemical Integrative Sampler (POCIS) carrier; (c) carrier on which one to three POCIS can be mounted; (d) 26 schematic diagram of extraction of analyte from POCIS device.

(a)

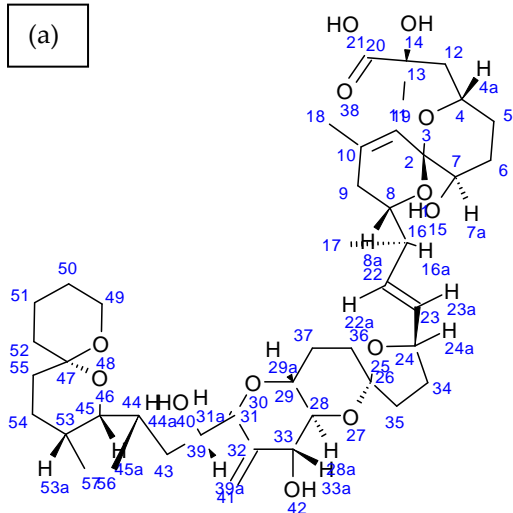

(b)

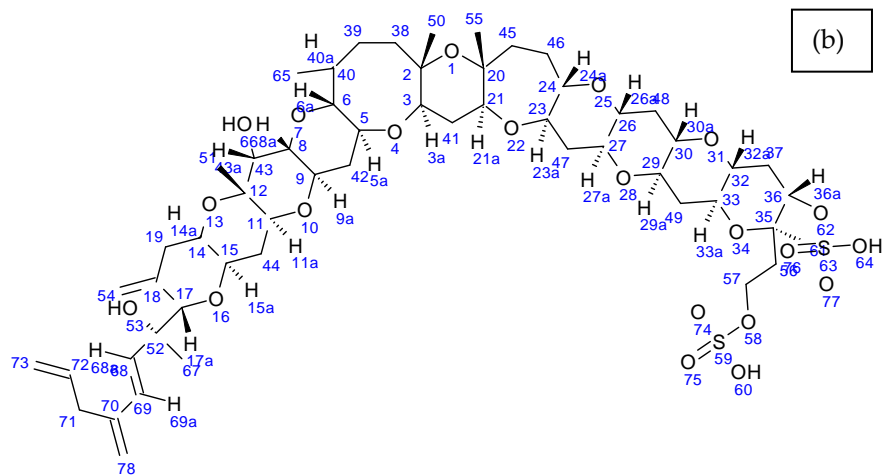

(c)

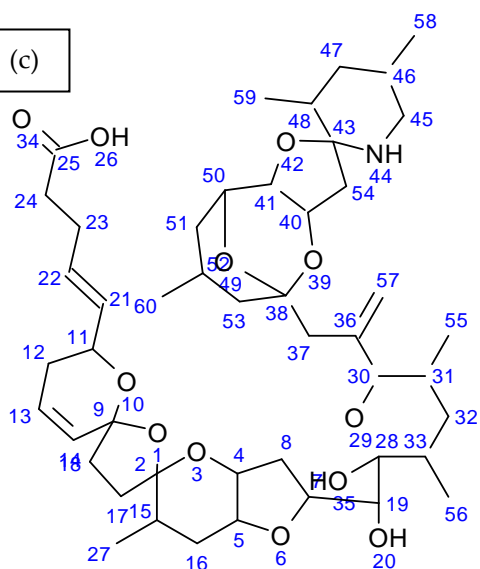

(d)

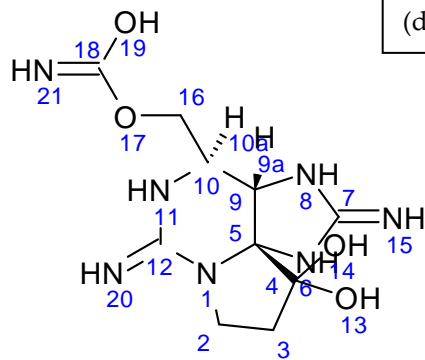

(e)

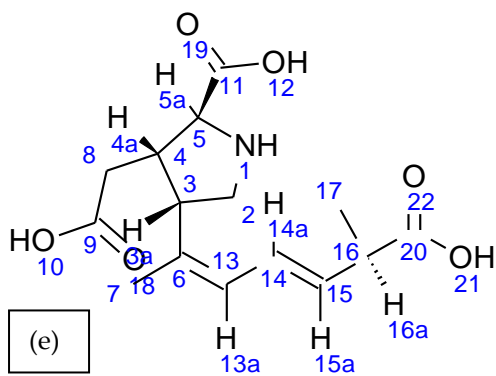

(f)

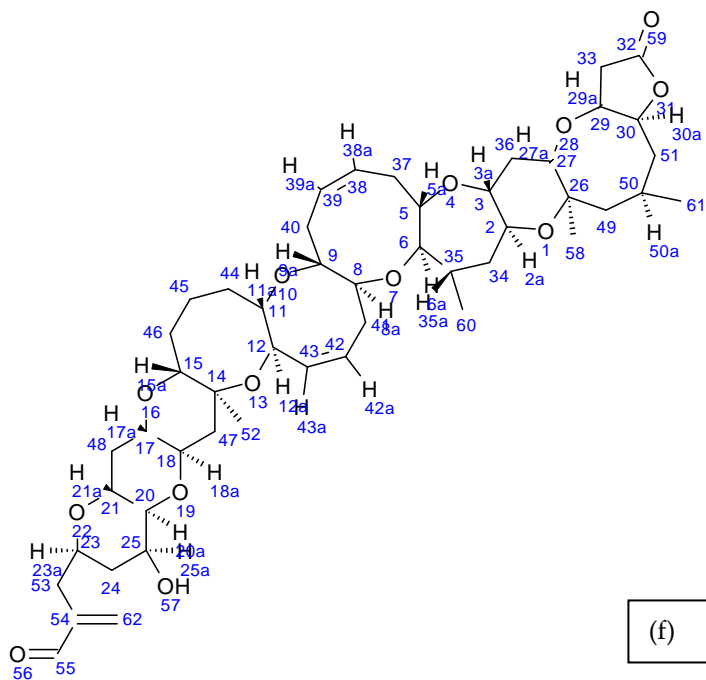

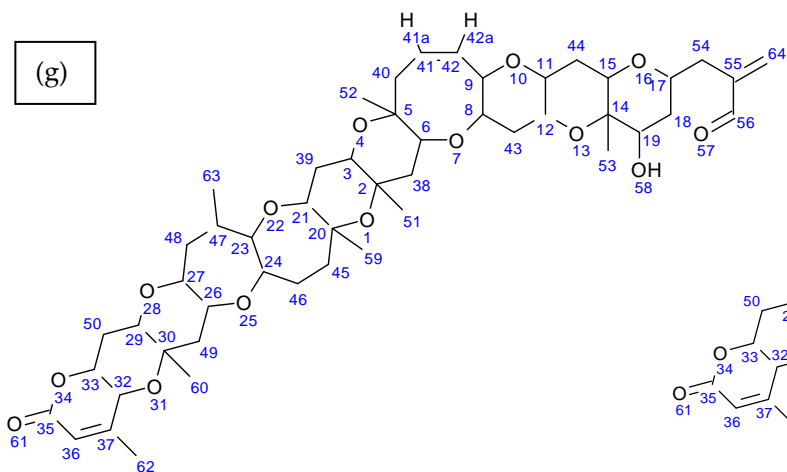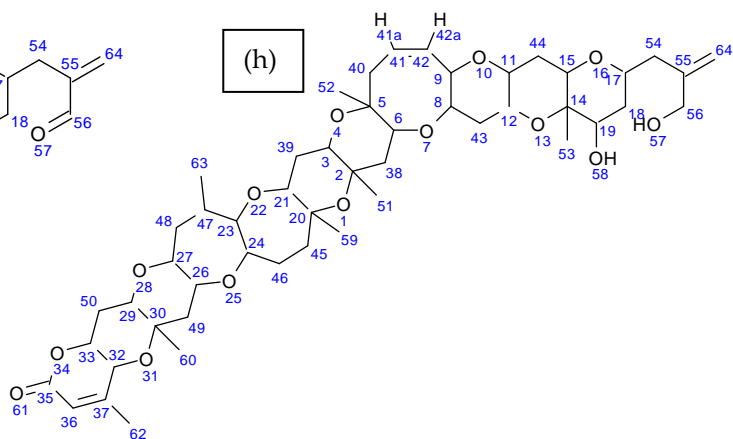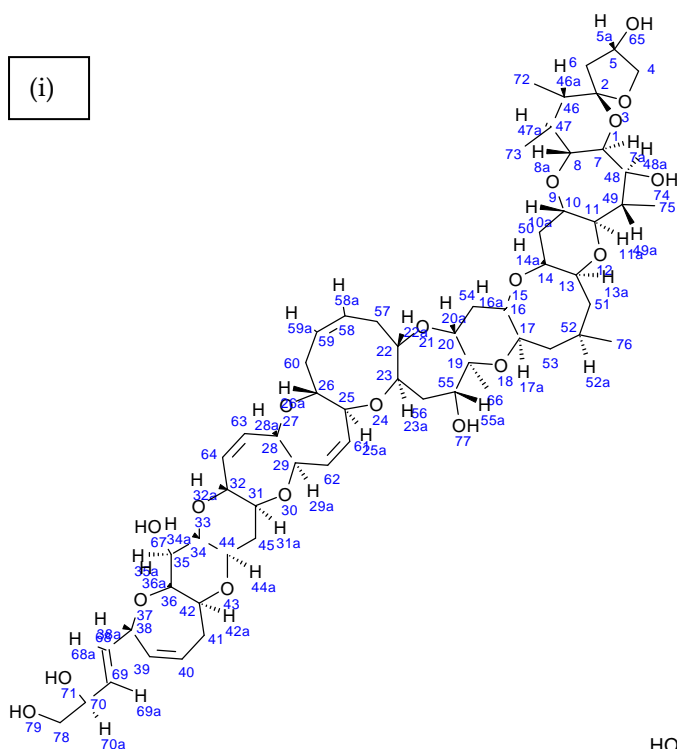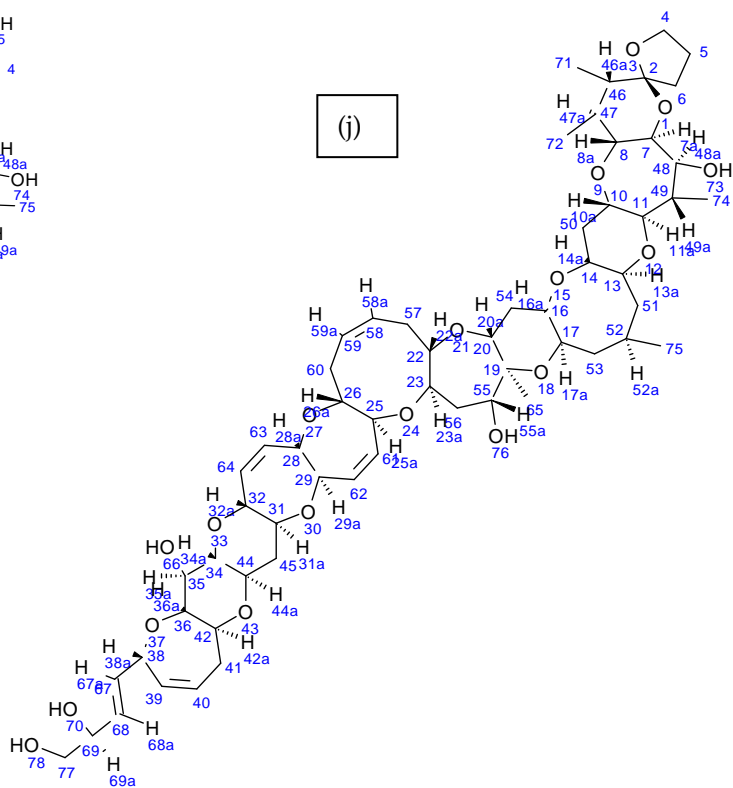

(k)

Chemical structure (k) is a complex polycyclic molecule, likely a natural product or a complex organic derivative. It features a central core with multiple fused and bridged rings. The structure is highly substituted with various functional groups, including hydroxyl groups (OH), a terminal hydroxyl group (HO-), and a methyl group (CH<sub>3</sub>). The molecule is characterized by numerous stereocenters, indicated by wedge and dash bonds, suggesting a complex stereochemistry. The structure is labeled with numerous atoms and bonds, including a terminal hydroxyl group (HO-), a methyl group (CH<sub>3</sub>), and a complex polycyclic core. The structure is highly substituted with various functional groups, including hydroxyl groups (OH), a terminal hydroxyl group (HO-), and a methyl group (CH<sub>3</sub>). The molecule is characterized by numerous stereocenters, indicated by wedge and dash bonds, suggesting a complex stereochemistry. The structure is labeled with numerous atoms and bonds, including a terminal hydroxyl group (HO-), a methyl group (CH<sub>3</sub>), and a complex polycyclic core.

(I)

The image displays a complex polycyclic chemical structure, likely a natural product or a synthetic molecule, with numerous atoms numbered for identification. The structure features several fused and linked rings, including a large macrocyclic system. Key features include:

- Atom numbering:** Atoms are numbered from 1 to 77, with some atoms having 'a' suffixes (e.g., 1a, 2a, 3a, 4a, 5a, 6a, 7a, 8a, 9a, 10a, 11a, 12a, 13a, 14a, 15a, 16a, 17a, 18a, 19a, 20a, 21a, 22a, 23a, 24a, 25a, 26a, 27a, 28a, 29a, 30a, 31a, 32a, 33a, 34a, 35a, 36a, 37a, 38a, 39a, 40a, 41a, 42a, 43a, 44a, 45a, 46a, 47a, 48a, 49a, 50a, 51a, 52a, 53a, 54a, 55a, 56a, 57a, 58a, 59a, 60a, 61a, 62a, 63a, 64a, 65a, 66a, 67a, 68a, 69a, 70a, 71a, 72a, 73a, 74a, 75a, 76a, 77a).
- Functional groups:** The structure includes several hydroxyl groups (OH), ether linkages (O), and a carbonyl group (C=O).
- Conformation:** The molecule is shown in a 3D representation, with wedged and dashed bonds indicating stereochemistry.
- Label (m):** A label '(m)' is enclosed in a box, likely indicating a specific conformation or a specific part of the molecule.

The image displays a complex polycyclic chemical structure, likely a natural product or a synthetic molecule, featuring a large macrocyclic ring system. The structure is composed of several fused and linked rings, including a large 18-membered ring and several smaller rings. The atoms are numbered from 1 to 62, with some atoms having additional labels (e.g., 1a, 2a, 3a, 4a, 5a, 6a, 7a, 8a, 9a, 10a, 11a, 12a, 13a, 14a, 15a, 16a, 17a, 18a, 19a, 20a, 21a, 22a, 23a, 24a, 25a, 26a, 27a, 28a, 29a, 30a, 31a, 32a, 33a, 34a, 35a, 36a, 37a, 38a, 39a, 40a, 41a, 42a, 43a, 44a, 45a, 46a, 47a, 48a, 49a, 50a, 51a, 52a, 53a, 54a, 55a, 56a, 57a, 58a, 59a, 60a, 61a, 62a). The structure includes various functional groups, such as hydroxyl groups (OH), and is shown in a perspective view. A box labeled (n) is present in the upper right corner, indicating a repeating unit or a specific structural feature.

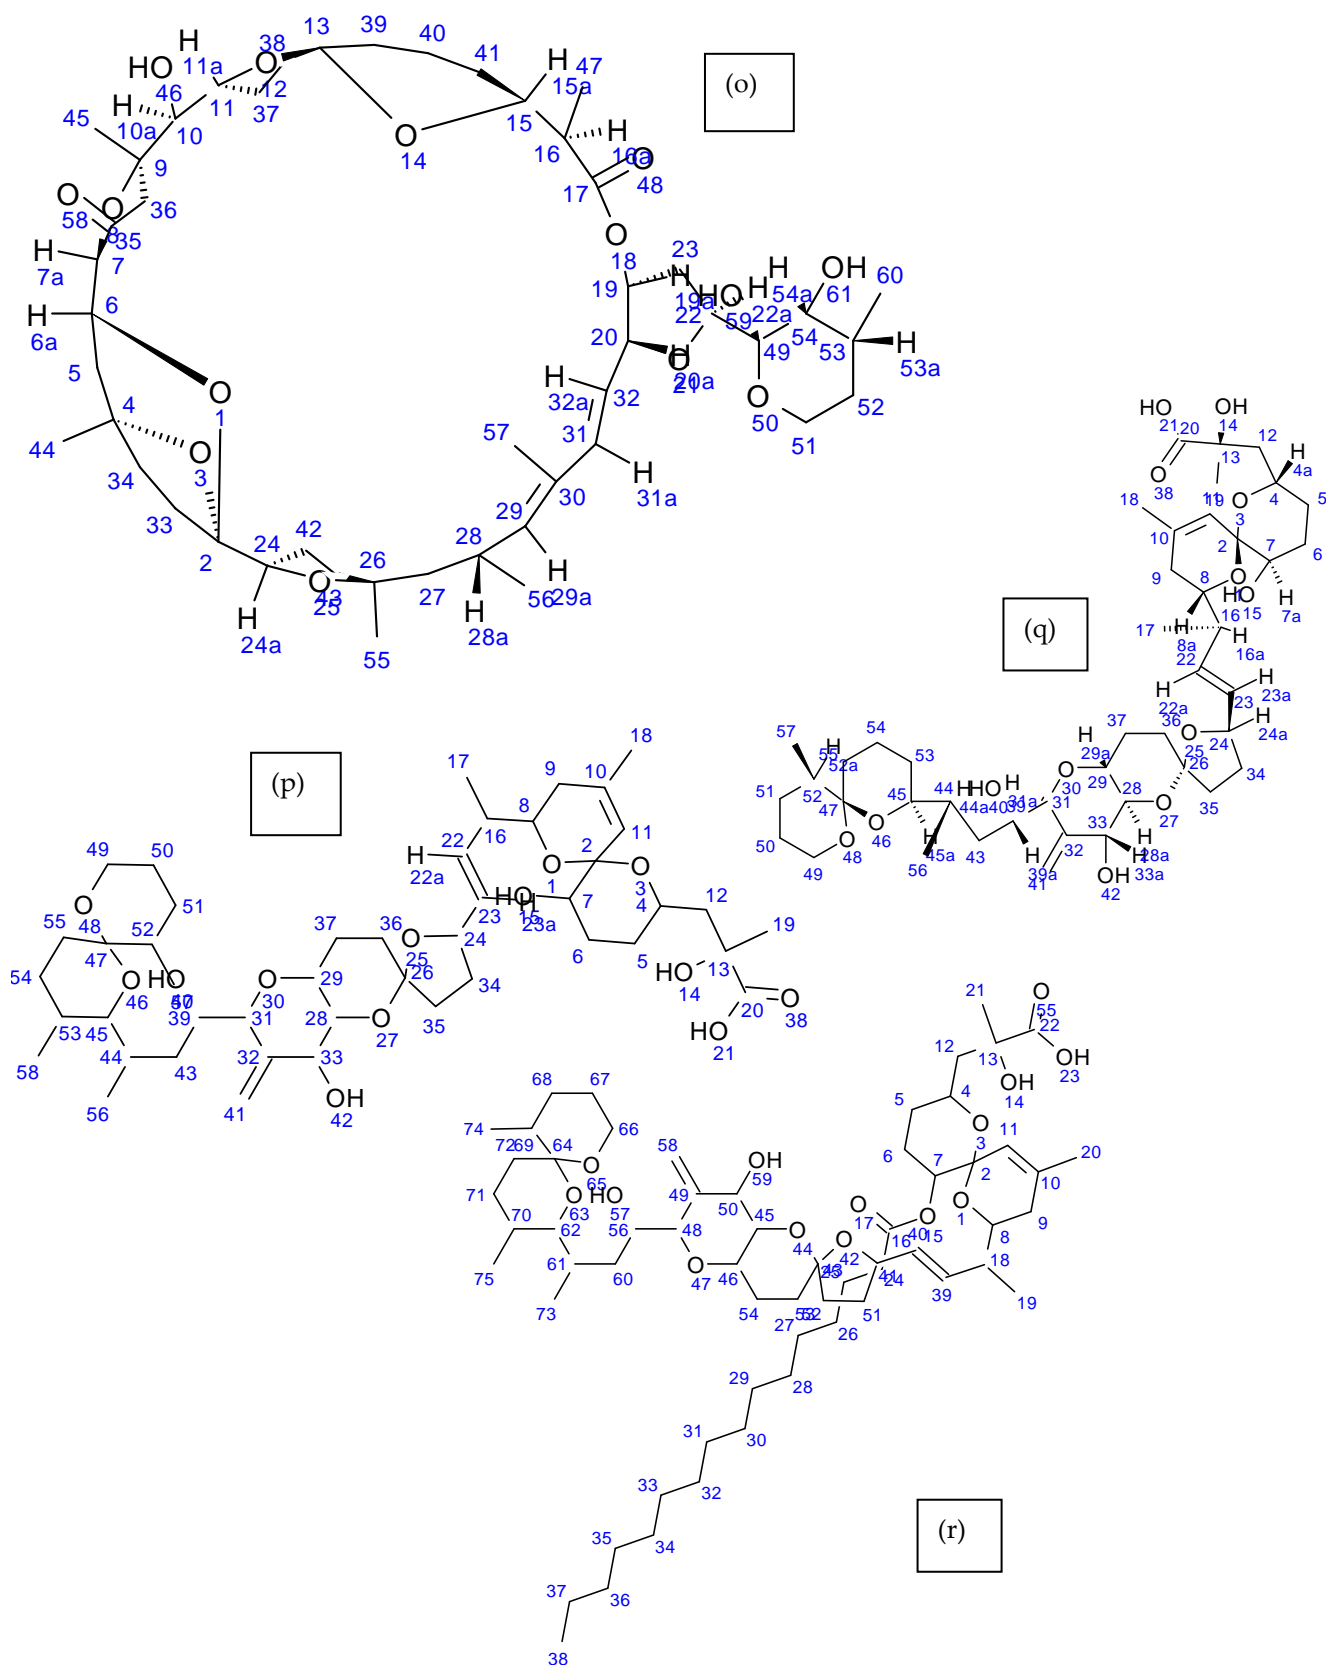

**Figure S1.** Marine biotoxin structures: (a) Okadaic acid (DSP); (b) yessotoxin (DSP); (c) Azaspiracid (AZP); (d) Saxitoxin (PSP); (e) Domoic acid (NSP); (f) 7 Brevetoxin (PbTX-1) Type-A (NSP); (g) PbTX-2 (Type-B); (h) PbTX-3 (Type-B); (i) Ciguatoxin-1 (CTX); (j) Ciguatoxin-2; (k) 8 Ciguatoxin-3; (l) Ciguatoxin-4A; (m) Ciguatoxin-4B; (n) Pectenotoxin-1 (PTX-1: DSP), (o) Pectenotoxin-2 (PTX-2: DSP), (p) Dinophysistoxin-1 (DTX-1: DSP), (q) Dinophysistoxin-2 (DTX-2: DSP) and (r) Dinophysistoxin-3 (DTX-3: DSP).

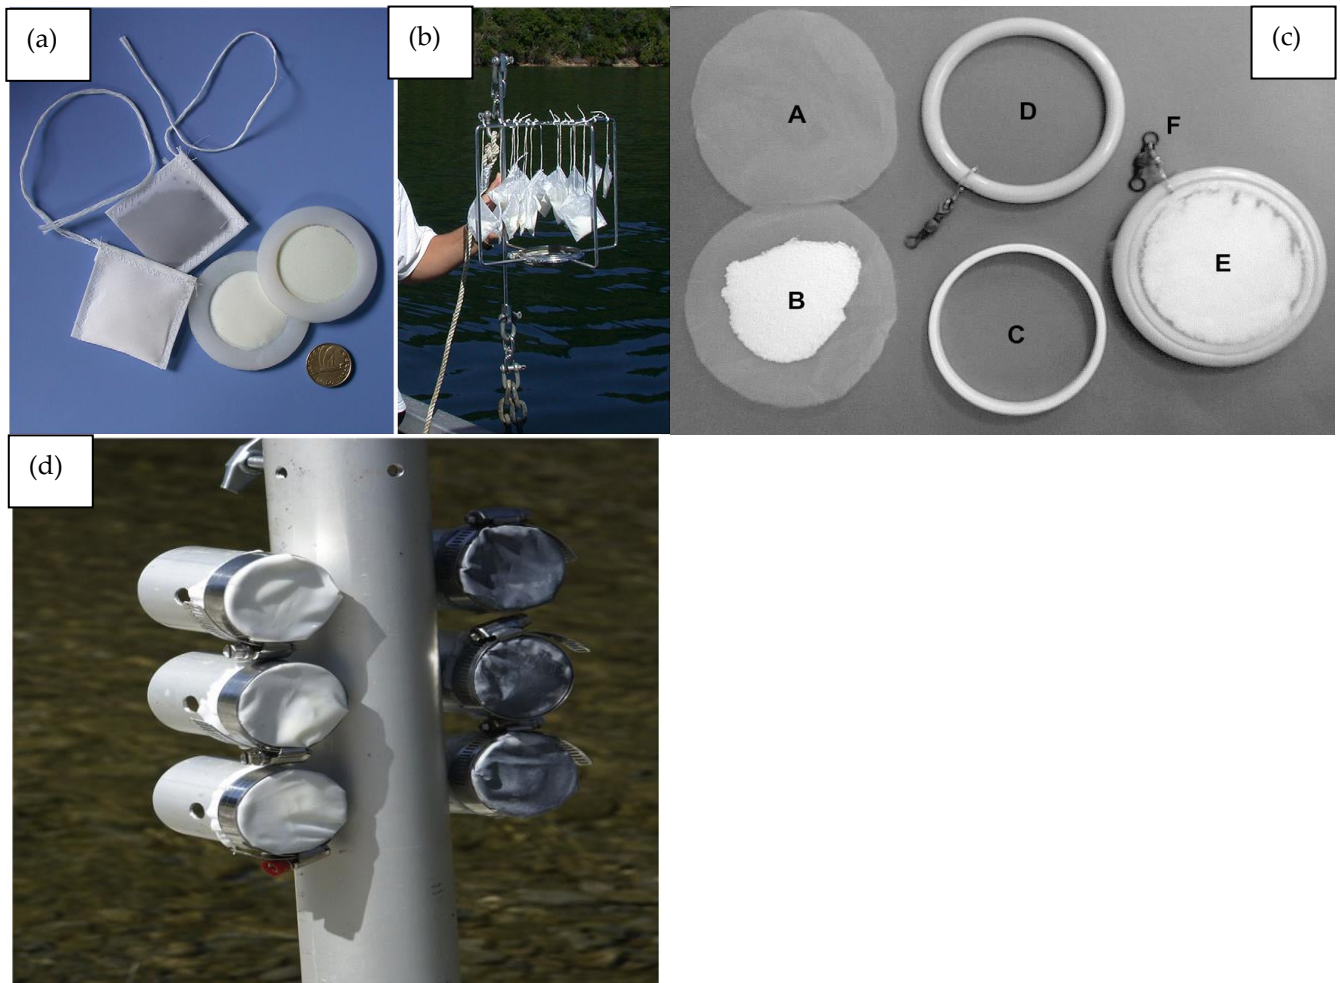

**Figure S2.** (a) SPATT bags and discs with various resins contained within 80 mm polyester mesh; (b) SPATT bags being 12 deployed. However, after this initial design other studies applied the same bags in a different manner to support the 13 SPATT bags in the water flow. Diagram [158]; (c) SPATT bags among holding tubes. (A) 100 mm nylon mesh, 14 (B) resin, (C) inner holding ring; (D) outer holding ring, (F) 75 mm diameter embroidery ring and (E) final assembled 15 sampling disk [242]. (d) SPATT bags attached to aluminum alloy [160].

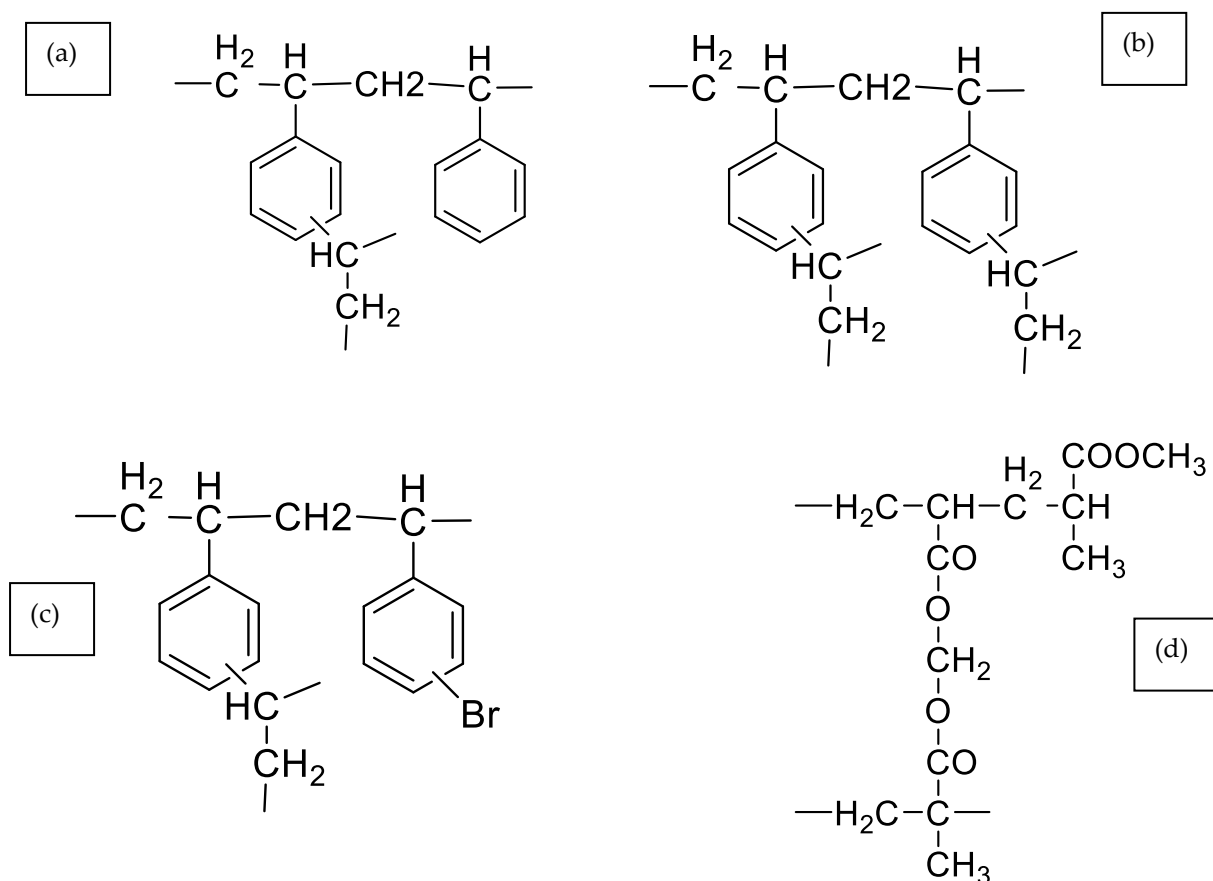

**Figure S3.** (a) Chemical Structure DIAION HP-20 (Aromatic synthetic adsorbent ion-exchange resin) Styrene-18 divinylbenzene [162]; (b) SEPABEADS SP700 (Aromatic synthetic adsorbent ion-exchange resin) [165] (c) SEPABEAD 19 SP207 (Modified Aromatic synthetic adsorbent ion-exchange resin) Brominated styrene divinylbenzene [164]; (d) 20 DIAION HP2MG (Methacrylic synthetic adsorbent ion-exchange resin) Polymethacrylate [164].

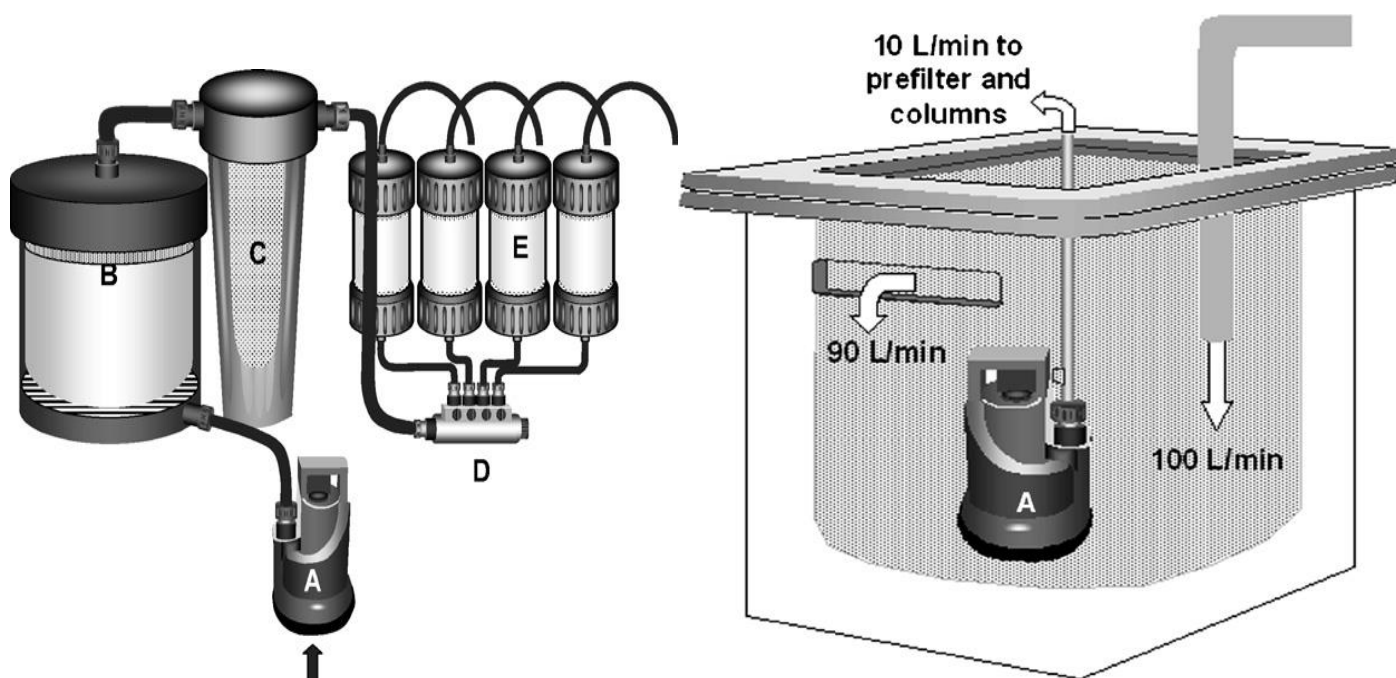

**Figure S4.** Schematic diagram of pumping system [159].

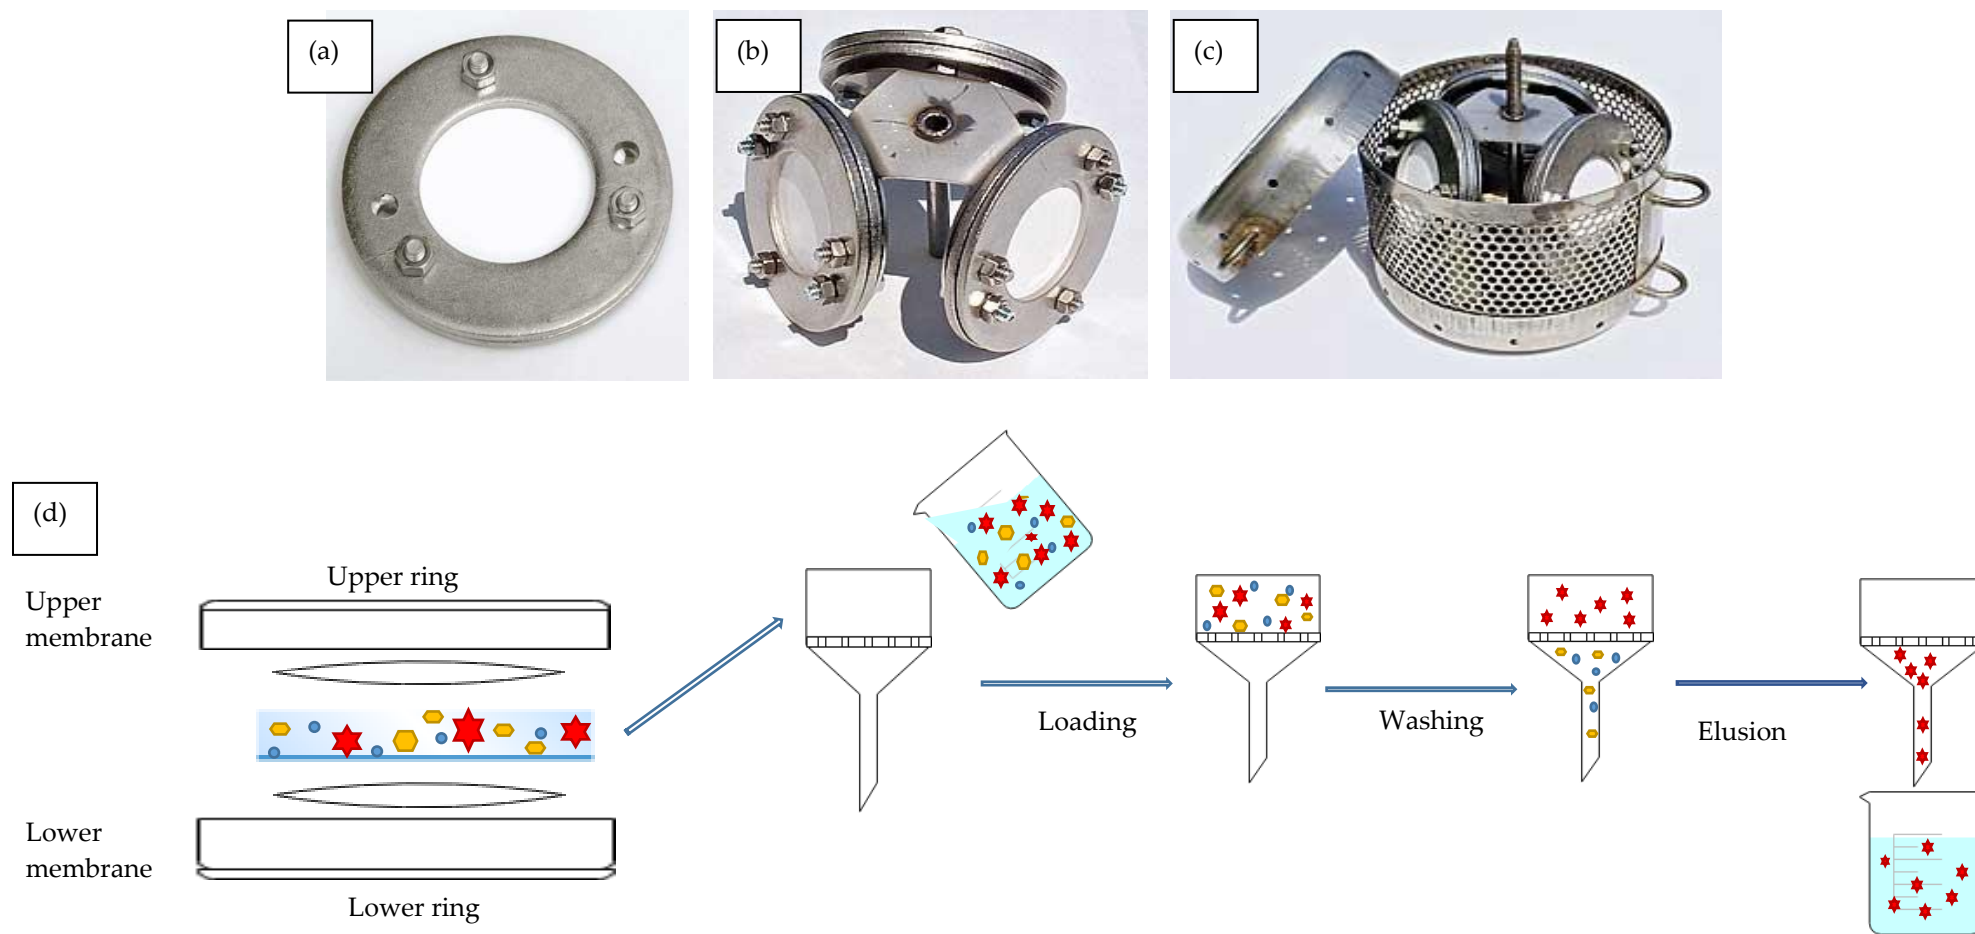

**Figure S5.** Organic Chemical Integrative Sampler (POCIS) device [316]: (a) POCIS or Aquasense-P disk; (b) Polar 25 Organic Chemical Integrative Sampler (POCIS) carrier; (c) carrier on which one to three POCIS can be mounted; (d) 26 schematic diagram of extraction of analyte from POCIS device.
